# Supplementary material
Source: PubMed Central journal article supplement (PMC3497923)

### **Online Supplemental Material**

The following tables and figures are included in the Online Supplemental Material.

**Supplemental Methods.** Literature search strategy in Pubmed.

**Supplemental Table 1.** Stratified analyses of pooled relative risk (RR) of total cardiovascular disease (CVD) according to alpha-linolenic acid status

**Supplemental Figure 1.** Funnel plots for detection of publication bias

**Supplemental Figure 2.** Sensitivity analysis of excluding retrospective case-control studies using dietary ALA intake or blood ALA biomarker level as the exposure

**Supplemental Figure 3.** Two-stage dose-response meta-analysis of (A) dietary alpha-linolenic acid (ALA) intake and risk of coronary heart disease (CHD) death; (B) ALA concentration in adipose tissue and risk of nonfatal CHD.

**Supplemental Methods.** Literature search strategy in Pubmed.

#1 Search "Fatty Acids, Omega-3"[Mesh] OR "n-3 fatty acid\*"[tiab] OR "omega-3 fatty acid\*"[tiab] OR "essential fatty acid\*"[tiab] OR "polyunsaturated fatty acid\*"[tiab] OR "ALA"[tiab] OR "alpha-linolenic acid"[tiab] OR "flaxseed oil"[tiab]

#2 Search "Neoplasms"[Mesh] OR "cancer\*"[tiab] OR "carcinoma\*"[tiab] OR "tumor\*"[tiab]

#3 Search "Cerebrovascular Disorders"[Mesh] OR "stroke\*"[tiab] OR "cerebrovascular accident\*"[tiab]

#4 Search "Cardiovascular diseases"[Mesh] OR "cardiovascular"[tiab] OR "heart"[tiab] OR "myocardial infarction\*"[tiab] OR "sudden death\*"[tiab]

#5 Search "Diabetes Mellitus"[Mesh] OR "diabet\*" [tiab]

#6 Search "Mortality"[Mesh] OR "Death"[Mesh] OR "mortality"[tiab] OR "death"[tiab] OR "fatal"[tiab]

#7 Search "Epidemiology "[MESH] OR "Epidemiologic Studies"[MESH] OR "Intervention Studies" [MESH] OR "cohort\*"[tiab] OR "incident\*"[tiab] OR "incidence\*"[tiab] OR "prospective"[tiab] OR "follow-up"[tiab] OR "predict\*"[tiab] OR "prognos\*"[tiab] OR "case-control"[tiab] OR "cross-sectional"[tiab] OR "intervention\*"[tiab] OR "clinical trial\*"[tiab] OR "randomized\*"[tiab]

#8 Search #2 OR #3 OR #4 OR #5 OR #6

#9 Search #1 AND #8

#10 Search #7 AND #9

**Supplemental Table 1.** Stratified analyses of pooled relative risk (RR) of total cardiovascular disease (CVD) according to alpha-linolenic acid status.

|                                  | No. of comparisons | RR (95% CI)      | Q-Statistic | P value for heterogeneity | I <sup>2</sup> value | P value of meta-regression |
|----------------------------------|--------------------|------------------|-------------|---------------------------|----------------------|----------------------------|
| Sex                              |                    |                  |             |                           |                      |                            |
| Male                             | 16                 | 0.92 (0.82-1.03) | 25.3        | 0.05                      | 40.7                 |                            |
| Female                           | 4                  | 1.00 (0.85-1.18) | 5.9         | 0.12                      | 49.3                 | 0.45                       |
| Both                             | 13                 | 0.76 (0.57-1.02) | 68.4        | <0.001                    | 82.5                 |                            |
| Baseline mean age                |                    |                  |             |                           |                      |                            |
| <60                              | 27                 | 0.83 (0.73-0.95) | 102.2       | <0.001                    | 74.6                 | 0.29                       |
| ≥60                              | 6                  | 1.03 (0.88-1.21) | 6.0         | 0.30                      | 17.1                 |                            |
| Exposure measurement             |                    |                  |             |                           |                      |                            |
| Dietary intake                   | 15                 | 0.90 (0.81-0.99) | 27.5        | 0.02                      | 49.0                 | 0.65                       |
| Biomarker level                  | 18                 | 0.83 (0.63-1.03) | 84.0        | <0.001                    | 79.8                 |                            |
| Outcomes                         |                    |                  |             |                           |                      |                            |
| Fatal CHD                        | 6                  | 0.81 (0.57-1.15) | 16.8        | 0.005                     | 70.2                 |                            |
| Nonfatal CHD                     | 10                 | 0.82 (0.67-1.02) | 24.3        | 0.004                     | 63.0                 | 0.98                       |
| Total CHD                        | 12                 | 0.87 (0.68-1.10) | 60.5        | <0.001                    | 81.8                 |                            |
| Stroke                           | 5                  | 0.94 (0.79-1.12) | 8.0         | 0.09                      | 49.7                 |                            |
| Study quality                    |                    |                  |             |                           |                      |                            |
| High                             | 22                 | 0.88 (0.79-0.99) | 42.7        | 0.003                     | 50.8                 | 0.49                       |
| Low                              | 11                 | 0.79 (0.61-1.02) | 66.4        | <0.001                    | 84.9                 |                            |
| Study design                     |                    |                  |             |                           |                      |                            |
| Prospective                      | 23                 | 0.95 (0.88-1.03) | 33.3        | 0.06                      | 34.0                 | 0.10                       |
| Retrospective                    | 10                 | 0.68 (0.46-1.02) | 61.6        | <0.001                    | 85.4                 |                            |
| Study location                   |                    |                  |             |                           |                      |                            |
| US and Costa Rica                | 14                 | 0.73 (0.57-0.92) | 83.0        | <0.001                    | 84.3                 | 0.07                       |
| European countries               | 19                 | 0.99 (0.91-1.08) | 21.3        | 0.27                      | 15.4                 |                            |
| Adjustment for lifestyle factors |                    |                  |             |                           |                      |                            |
| Yes                              | 28                 | 0.88 (0.78-0.99) | 104.7       | <0.001                    | 74.2                 | 0.38                       |
| No                               | 5                  | 0.71 (0.49-1.03) | 4.4         | 0.35                      | 9.6                  |                            |
| Adjustment for other fatty acids |                    |                  |             |                           |                      |                            |
| Yes                              | 15                 | 0.92 (0.80-1.06) | 39.9        | <0.001                    | 64.9                 | 0.20                       |
| No                               | 18                 | 0.78 (0.65-0.94) | 71.1        | <0.001                    | 76.1                 |                            |

Meta-regression analysis was conducted by adding the individual variable in the model.

**Supplemental Figure 1.** Funnel Plots for Detection of Publication Bias for (A) overall results; (B) dietary ALA intake as the exposure; (C) ALA biomarker level as the exposure.

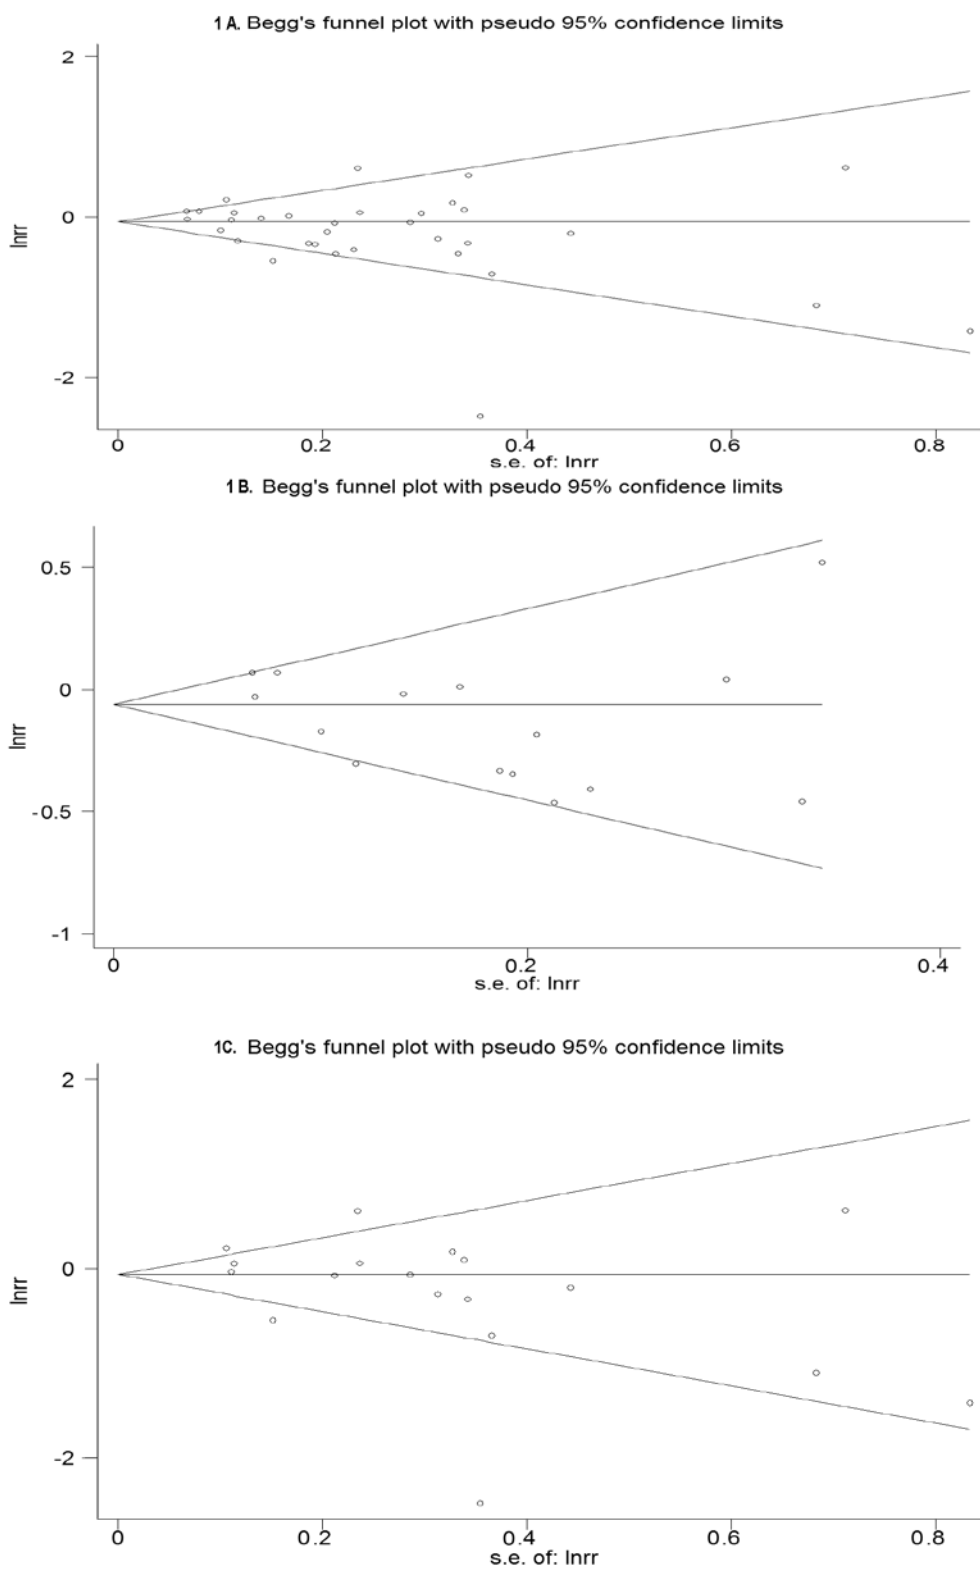

**Supplemental Figure 2.** Sensitivity analysis of excluding retrospective case-control studies using dietary ALA intake or blood ALA biomarker level as the exposure.

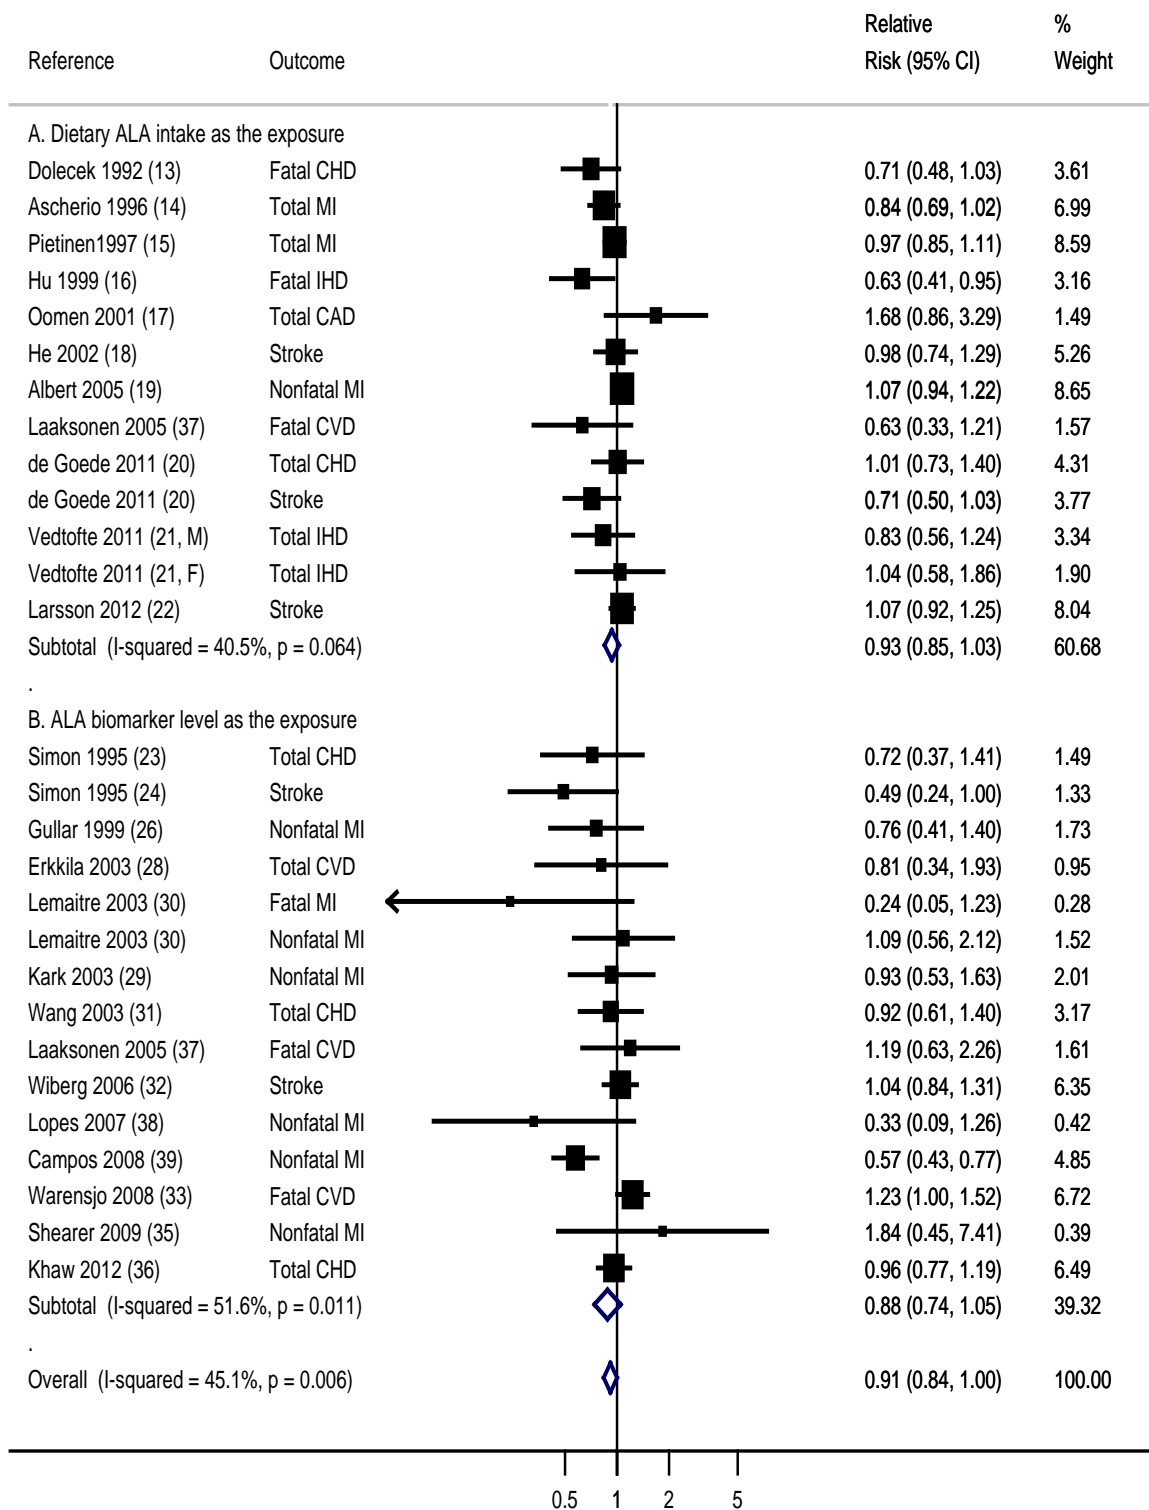

**Supplemental Figure 3.** Two-stage dose-response meta-analysis of (A) each 1 g/d increment of dietary alpha-linolenic acid (ALA) intake and risk of coronary heart disease (CHD) death; (B) each 0.5% increment of ALA concentration in adipose tissue and risk of nonfatal CHD.

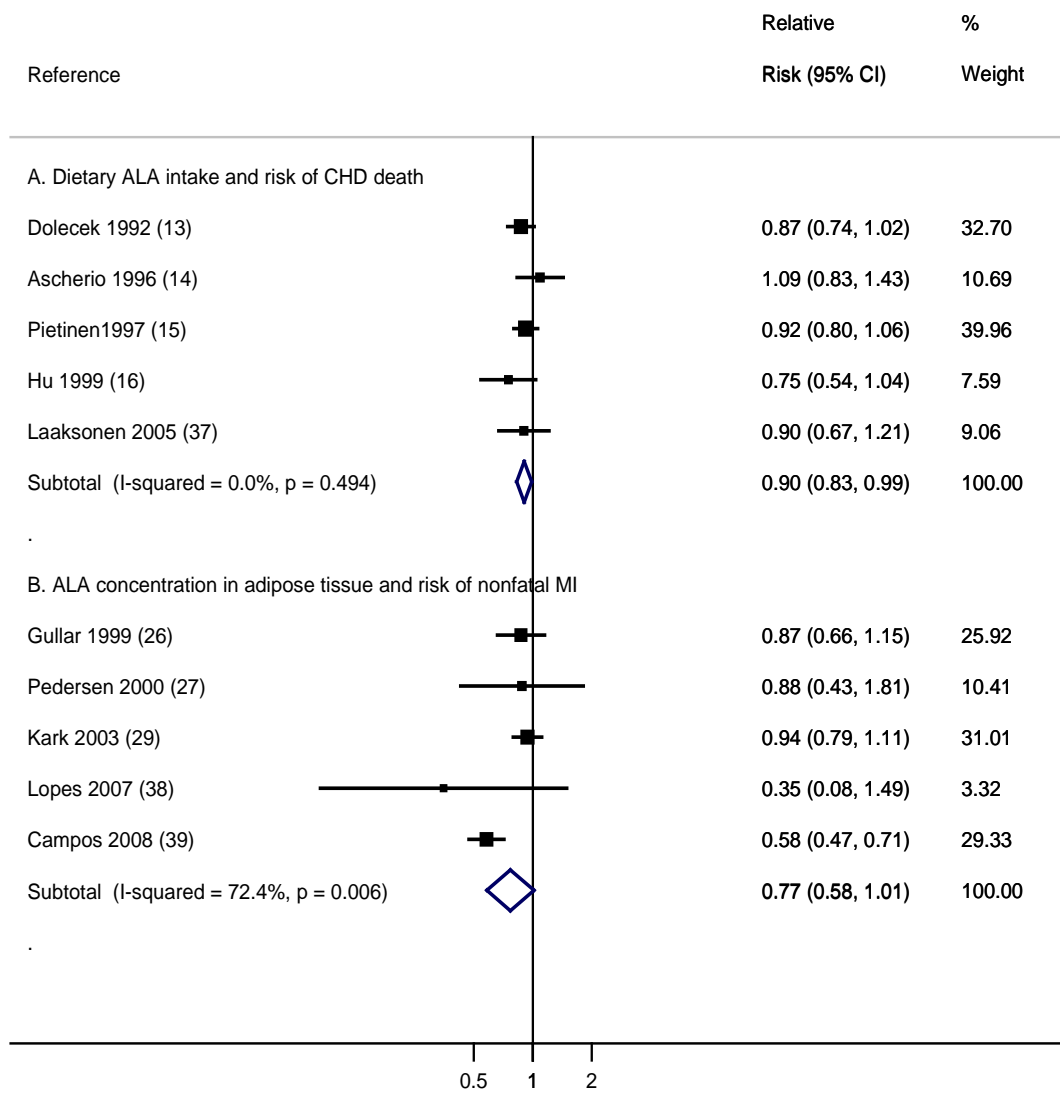

Supplement: supp_112.044040_ajcn044040-STable_1_SFig_1-3.pdf [file supp_112.044040_ajcn044040-STable_1_SFig_1-3.pdf]
